# Supplementary material for: WDSPdb: an updated resource for WD40 proteins
Source: Oxford University Press journal article supplement (doi:10.1093/bioinformatics/btz460), 2019-05-30
Supplement: bioinformatics_35_22_4824_s2.pdf [file bioinformatics_35_22_4824_s2.pdf]

# Supplementary information

## 1. WD40-repeat domain structures and featured sites

The WD40-repeat domains are abundant in proteomes, especially in eukaryotes. As popular interaction molecules, they act as scaffolds to assemble various complexes that fulfill versatile functions, and thus play indispensable roles in many cellular processes. This type of domain is a  $\beta$ -propeller usually formed by 6-8 repeats, and the sequence of one single repeat contains 40-60 residues with conserved GH and WD dipeptide (Stirnemann, *et al.*, 2010; Wang, *et al.*, 2013; Xu and Min, 2011). Each WD40 repeat folds into a four-stranded antiparallel  $\beta$ -sheet (strand *d*, *a*, *b* and *c*, connected by loops), and is often stabilized by a strong side-chain hydrogen bond network (Wang, *et al.*, 2013; Wu, *et al.*, 2010) (**Figure S1A,B**), which is widely and uniquely presented in WD40 proteins. WD40 domain has three faces, *i.e.* top, side and bottom faces, to mediate the interactions with partners. The top face is better studied than others, and the potential hotspot residues on this face are exposed into the solvent by the  $\beta$  bulge between the strand *a* and strand *b* to participate in interactions. Previously, we defined a method to predict the potential hotspots residues on the top face (Wu, *et al.*, 2012). If binding-type residues (Arg, His, Lys, Asp, Glu, Trp, Tyr, Phe, Leu, Ile, Met, Asn, Gln)(Wu, *et al.*, 2012) occur at specific positions (**Figure S1C**, R<sub>1</sub>, R<sub>1</sub>-2, D-1; **Figure S2**, red asterisk), they will be predicted as potential hotspots at the top face. Based on these, the WDSP tool were thereafter developed to accurately predict the secondary structures of WD40 domains, hydrogen bond networks, and interaction hotspots (Wang, *et al.*, 2013). In this work, we first updated the WDSP tool, and then we applied the improved WDSP in an optimized pipeline for the WDSPdb curation.

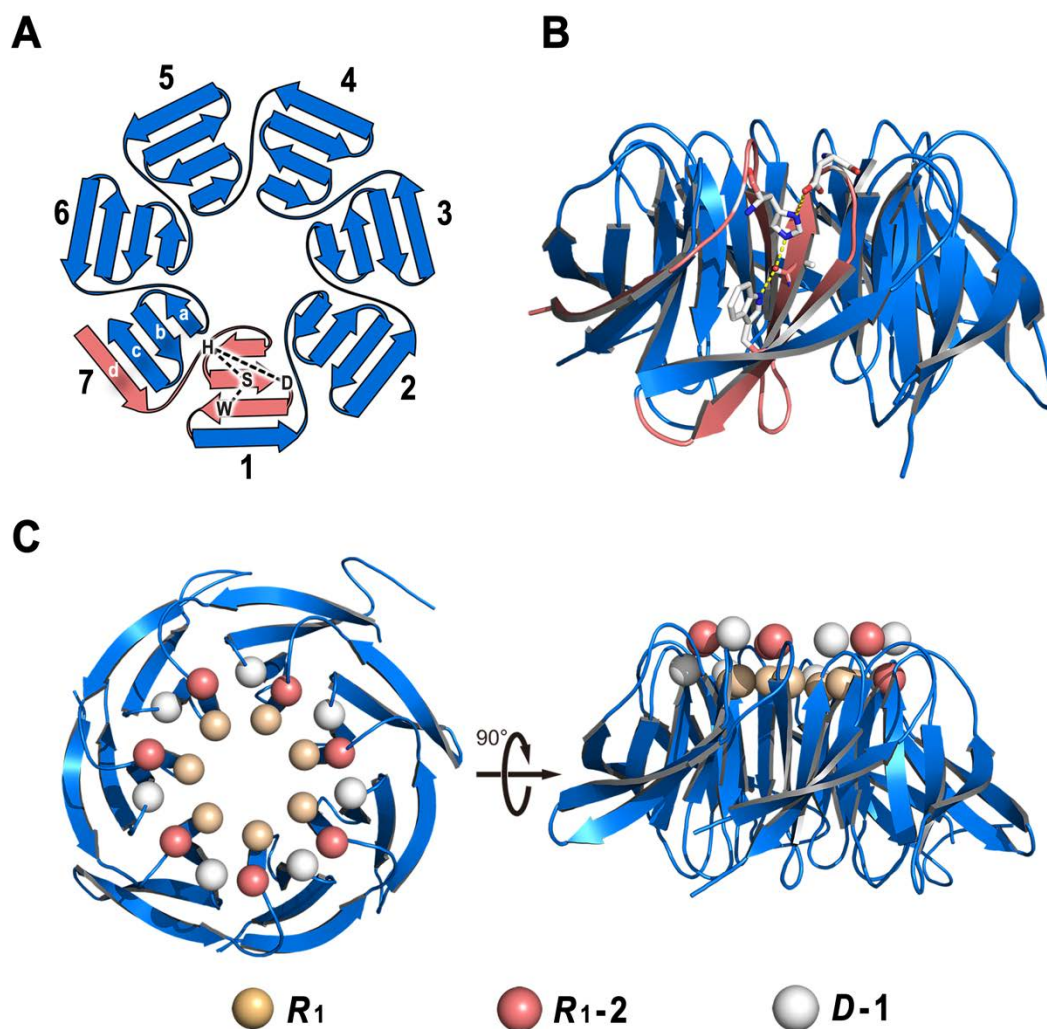

**Figure S1** The schematic diagrams of WD40 domain structures and featured sites.

- A)** The 2D schematic diagram of one typical WD40 domain and repeat as well as the featured hydrogen bond network. The red colored  $\beta$ -strands compose one WD40 repeat. The continuous strand *d*, *a*, *b*, and *c* forms a WD40 repeat, while the continuous strand *a*, *b*, *c* from one repeat, and *d* from the next repeat forms a structural blade. The featured tetrad hydrogen bond network residues are marked.
- B)** The 3D schematic diagram of one typical WD40 domain. A typical repeat is coloured red, and a featured hydrogen bond network is shown as ball-and-sticks (PDB ID: 3FM0, CIAO1\_HUMAN).
- C)** The 3D schematic diagram of potential interaction hotspots residues on the top face of WD40 domain. Their positions are R<sub>1</sub>, R<sub>1-2</sub>, D-1, respectively (PDB ID: 3FM0, CIAO1\_HUMAN)

## 2. Update of WDSP tool

### 2.1 Typical WD40 proteins with experimental structures

In recent years, many experimental structures of WD40 proteins have been determined. The Swiss-Prot section of UniProtKB (release July 5, 2017) contained 97 proteins with typical WD40 structures deposited in PDB (**Table S1**). We performed pairwise global alignment among them, and those with sequence identity greater than 30% formed clusters. To obtain a non-redundant protein set, we kept only one protein within the same cluster. As a result, 65 proteins were retained. This set was used for building the position weight matrix in the update of WDSP tool. It also served as a “reference” set for setting up criteria for confidence category assignment (see section 3.3).

**Table S1** WD40 proteins with typical structures\*

| Number | UniProt ACC | Gene name    | PDB ID | WD40 domain start | WD40 domain end | Redundant or not |
|--------|-------------|--------------|--------|-------------------|-----------------|------------------|
| 1      | G0SFB5      | YTM1         | 5CXB   | 100               | 486             |                  |
| 2      | G0SCK6      | ERB1         | 5CXB   | 436               | 801             | Redundant        |
| 3      | O00423      | EML1         | 4CI8   | 258               | 813             |                  |
| 4      | O14011      | prp19        | 3JB9   | 196               | 488             |                  |
| 5      | O14727      | APAF1        | 3JBT   | 594               | 1245            |                  |
| 6      | G0SC29      | CTHT_0055700 | 4WJS   | 134               | 516             | Redundant        |
| 7      | O88879      | Apaf1        | 3SFZ   | 595               | 910             | Redundant        |
| 8      | O36030      | SPAC4F10.18  | 4GQ1   | 15                | 386             |                  |
| 9      | O43172      | PRPF4        | 3JCR   | 216               | 520             |                  |
| 10     | P20053      | PRP4         | 5GAN   | 162               | 465             | Redundant        |
| 11     | O43660      | PLRG1        | 4YVD   | 192               | 490             |                  |
| 12     | O13615      | prp5         | 3JB9   | 152               | 449             | Redundant        |
| 13     | Q12417      | PRP46        | 5GMK   | 128               | 427             | Redundant        |
| 14     | O43818      | RRP9         | 4J0W   | 135               | 463             |                  |
| 15     | O55029      | Copb2        | 5A1U   | 5                 | 300             |                  |
| 16     | P41811      | SEC27        | 2YNP   | 4                 | 299             | Redundant        |

|    |        |          |      |     |     |           |
|----|--------|----------|------|-----|-----|-----------|
| 17 | O60508 | CDC40    | 5MQF | 275 | 579 |           |
| 18 | P40968 | CDC40    | 5GMK | 151 | 455 | Redundant |
| 19 | O74910 | raf1     | 4O9D | 225 | 617 |           |
| 20 | O75530 | EED      | 5U69 | 82  | 438 |           |
| 21 | Q921E6 | Eed      | 2QXV | 82  | 438 | Redundant |
| 22 | O75717 | WDHD1    | 5GVA | 4   | 301 |           |
| 23 | O76071 | CIAO1    | 3FM0 | 6   | 332 |           |
| 24 | Q05583 | CIA1     | 2HES | 5   | 325 | Redundant |
| 25 | O89053 | Coro1a   | 2AQ5 | 23  | 349 |           |
| 26 | P07834 | CDC4     | 3V7D | 366 | 742 |           |
| 27 | P16649 | TUP1     | 1ERJ | 329 | 706 |           |
| 28 | P25382 | RSA4     | 4WJU | 131 | 514 |           |
| 29 | P25635 | PWP2     | 5WYK | 5   | 705 |           |
| 30 | P35184 | SQT1     | 4ZOX | 55  | 428 |           |
| 31 | P38011 | ASC1     | 3FRX | 8   | 314 |           |
| 32 | O18640 | Rack1    | 4V6W | 6   | 312 | Redundant |
| 33 | O24456 | RACK1A   | 3DM0 | 6   | 323 | Redundant |
| 34 | P38262 | SIF2     | 1R5M | 144 | 534 |           |
| 35 | P39108 | PEX7     | 3W15 | 1   | 372 |           |
| 36 | P40362 | UTP18    | 5WYK | 234 | 590 |           |
| 37 | P42935 | ELP2     | 5M2N | 6   | 784 |           |
| 38 | P46680 | AIP1     | 1PGU | 5   | 611 |           |
| 39 | P53011 | SEH1     | 3F3F | 1   | 332 |           |
| 40 | P53196 | RPN14    | 3VL1 | 15  | 413 |           |
| 41 | P55735 | SEC13    | 3BG1 | 3   | 290 |           |
| 42 | P53024 | SEC13    | 4L9O | 1   | 274 | Redundant |
| 43 | P61964 | WDR5     | 4ERY | 36  | 331 |           |
| 44 | P61965 | Wdr5     | 2XL2 | 36  | 331 | Redundant |
| 45 | Q498M4 | Wdr5     | 4QQE | 36  | 331 | Redundant |
| 46 | Q9V3J8 | wds      | 4CY3 | 62  | 358 | Redundant |
| 47 | P62881 | Gnb5     | 2PBI | 95  | 395 |           |
| 48 | P54311 | Gnb1     | 5TDH | 46  | 340 | Redundant |
| 49 | P62871 | GNB1     | 5KDO | 46  | 340 | Redundant |
| 50 | P63005 | Pafah1b1 | 1VYH | 98  | 408 |           |
| 51 | P63151 | PPP2R2A  | 3DW8 | 16  | 443 |           |
| 52 | P78406 | RAE1     | 3MMY | 30  | 356 |           |
| 53 | Q04660 | ERB1     | 4U7A | 421 | 806 |           |
| 54 | Q04724 | TLE1     | 1GXR | 467 | 767 |           |
| 55 | Q05946 | UTP13    | 5WYK | 4   | 645 |           |
| 56 | Q06506 | RRP9     | 4J0X | 142 | 567 |           |
| 57 | Q09028 | RBBP4    | 4R7A | 53  | 403 |           |

|    |        |              |      |     |      |           |
|----|--------|--------------|------|-----|------|-----------|
| 58 | P39984 | HAT2         | 4PSW | 35  | 381  | Redundant |
| 59 | Q16576 | RBBP7        | 3CFS | 29  | 402  | Redundant |
| 60 | Q24572 | Caf1         | 2XYI | 34  | 407  | Redundant |
| 61 | Q11176 | unc-78       | 1NR0 | 51  | 608  |           |
| 62 | Q12220 | DIP2         | 5WYK | 9   | 685  |           |
| 63 | Q12834 | CDC20        | 4GGC | 169 | 471  |           |
| 64 | P78972 | slp1         | 4AEZ | 167 | 464  | Redundant |
| 65 | P53197 | CDH1         | 4BH6 | 246 | 543  | Redundant |
| 66 | Q9UM11 | FZR1         | 4UI9 | 172 | 471  | Redundant |
| 67 | Q13216 | ERCC8        | 4A11 | 34  | 362  |           |
| 68 | Q16531 | DDB1         | 3EI3 | 17  | 1041 |           |
| 69 | Q2YDS1 | ddb2         | 3EI3 | 103 | 419  |           |
| 70 | Q3Y8L7 | DAW1         | 5MZH | 84  | 417  |           |
| 71 | Q58CQ2 | ARPC1B       | 1K8K | 1   | 358  |           |
| 72 | P78774 | arc1         | 3DWL | 2   | 376  | Redundant |
| 73 | Q5IH81 | EIF3I        | 5K0Y | 1   | 315  |           |
| 74 | P40217 | TIF34        | 3ZWL | 1   | 321  | Redundant |
| 75 | Q86YC2 | PALB2        | 2W18 | 737 | 1184 |           |
| 76 | Q8CIE6 | Copa         | 5A1U | 2   | 318  |           |
| 77 | Q96WV5 | SPBPJ4664.04 | 4J87 | 1   | 325  | Redundant |
| 78 | Q8NFH3 | NUP43        | 4I79 | 2   | 375  |           |
| 79 | Q8NHY2 | COP1         | 5HQG | 400 | 729  |           |
| 80 | P43254 | COP1         | 5IGO | 354 | 672  | Redundant |
| 81 | Q8TAF3 | WDR48        | 5K1A | 20  | 325  |           |
| 82 | Q8TBZ3 | WDR20        | 5K19 | 89  | 559  |           |
| 83 | Q8TEQ6 | GEMIN5       | 5TEE | 3   | 711  |           |
| 84 | Q969H0 | FBXW7        | 2OVR | 365 | 701  |           |
| 85 | Q96DI7 | SNRNP40      | 5MQF | 56  | 353  |           |
| 86 | O94620 | cwf17        | 3JB9 | 39  | 338  | Redundant |
| 87 | Q96EE3 | SEH1L        | 5A9Q | 2   | 306  |           |
| 88 | Q04491 | SEC13        | 2PM7 | 1   | 282  | Redundant |
| 89 | Q96MX6 | WDR92        | 3I2N | 8   | 350  |           |
| 90 | Q9BQA1 | WDR77        | 4GQB | 18  | 328  |           |
| 91 | Q6NUD0 | wdr77        | 4G56 | 8   | 316  | Redundant |
| 92 | Q9BZK7 | TBL1XR1      | 4LG9 | 158 | 511  |           |
| 93 | Q8BHI5 | Tbl1xr1      | 5NAF | 158 | 511  | Redundant |
| 94 | Q9GZS3 | WDR61        | 3OW8 | 6   | 302  |           |
| 95 | Q9HCU5 | PREB         | 5TF2 | 4   | 382  |           |
| 96 | Q9UMS4 | PRPF19       | 4LG8 | 208 | 503  |           |
| 97 | Q9Y297 | BTRC         | 1P22 | 284 | 581  |           |

\*The proteins separated by dashed lines and shaded are sequence clusters, whose

sequence identity is greater than 30%. In each sequence cluster, the protein(s) marked as redundant are removed, and only one protein is retained in the non-redundant “reference” set.

## 2.2 Update of position weight matrix (PWM) of WD40-repeats

The position weight matrix (PWM, visualized as a sequence logo) is important for accurately and sensitively identifying the WD40 proteins when using the WDSP tool. Previously, we built the PWM using 33 WD40 structures, and here we updated it using this larger non-redundant “reference” set, which containing 65 WD40 structures with 534 repeats (**Table S1**). In brief, the WD40 repeat regions, the  $\beta$ -strands, and loops of WD40 repeats were manually determined by visual inspection of the domain structures. We built the multiple sequence alignment by preferentially and exactly aligning the corresponding  $\beta$ -strands. The loop regions between the  $\beta$ -strands have been manually cut to keep only conserved sites according to our previous experiences (**Figure S2**) (Wang, *et al.*, 2013). By counting the residue counts in each aligned position, the PWM can be built, and the sequence logo can be generated. In the sequence logo, the letter size represents the conservation level of each amino acid at that site.

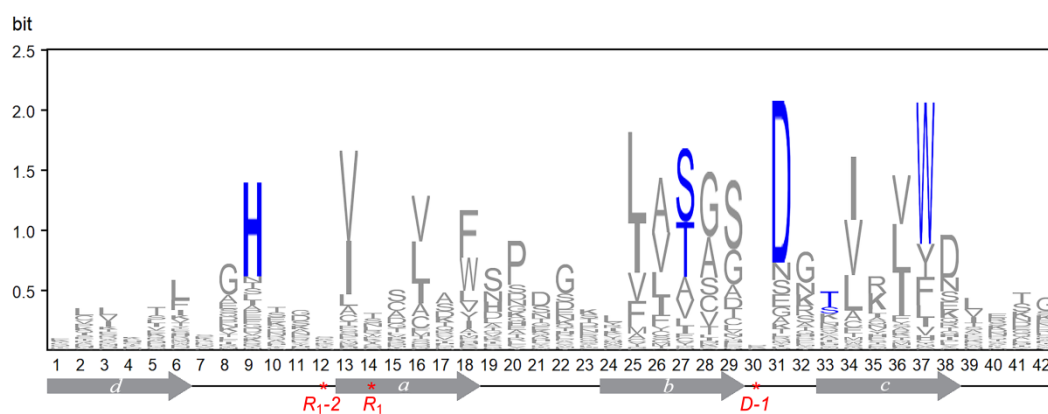

**Figure S2** The updated sequence logo of the WD40 repeat.

The total height of the letters represents the conservation of each site. The secondary structures have been shown below the x-axis with arrows indicating the  $\beta$ -strands

(length of strand  $d/a/b/c=6$ ) and lines representing the loops (length of loop  $da=6$ ,  $ab=5$ ,  $bc=3$ ,  $cd=4$ ). The positions highlighted by red asterisks are the potential hotspots positions on the top face involved in interactions. The blue residues may form side-chain hydrogen bond networks.

## 2.3 Update of the PSIPRED backend

PSI-blast based secondary structure PREDiction (PSIPRED) is one of the best methods for predicting the protein regular secondary structures (Buchan, *et al.*, 2013), and it was used as a backend of WDSP. That is, the predicted secondary structures from PSIPRED were used as the starting point of WDSP. Previously, WDSP utilized PSIRPED V3, and Swiss-Prot was used as the homolog-searching database. Here, we replaced the PSIPRED from V3 to V4 ([bioinfadmin.cs.ucl.ac.uk/downloads/psipred](http://bioinfadmin.cs.ucl.ac.uk/downloads/psipred)). In the process of curation of WDSPdb described below, we chose UniRef90 as the homolog-searching database for annotating WD40 proteins from Swiss-Prot section to obtain better results. For annotating WD40 proteins from TrEMBL section we kept using Swiss-Prot as homolog-searching database to save computing resources, since proteins from TrEMBL is of a huge amount.

## 2.4 The performance of updated WDSP

To evaluate the capability of the updated WDSP in identifying WD40 repeats, we compared its predictions with the repeat regions derived from crystal structures using the aforementioned non-redundant “reference” set of WD40 proteins. To avoid over-fitting, we performed a five-fold cross validation. In brief, we randomly divided these 65 proteins into 5 parts, and used the WD40 repeats from 4 parts to generate the position weight matrix (PWM) in WDSP. Then the WDSP with this PWM was adopted to predict the last part of WD40 proteins. By comparing between predicted secondary structure and actual secondary structure, we can obtain its performance. This process was repeated 5 rounds, and each round we generated different PWM and

compared on different protein parts, so that each repeat was tested exactly for one time. The overall results can be used to calculate the average performance in the cross-validation.

The performance was also evaluated for other methods (old version of WDSP, UniProt REP, SMART, PROSITE, and Pfam) (Bateman, *et al.*, 2017; Finn, *et al.*, 2016; Letunic and Bork, 2018; Sigrist, *et al.*, 2013; Wang, *et al.*, 2013) using this non-redundant set of WD40 proteins as reference. Since they are less conserved than other repeats and loops, the predictions of strand *d* and loop *da* are much harder than other strands and loops. Hence in the comparison between predictions and actual secondary structures, we adopted two criteria, the loose and the strict. As for the loose criterion, we considered the identification correct when the actual repeat from strand *a* to strand *c* could be completely covered by the predicted repeat. As for the strict criteria, we considered that a whole actual repeat (from strand *d* to strand *c*) or a blade (from strand *a* to next strand *d*) should be found in the predicted repeat or blade with only two amino acids' shift at the boundaries tolerated.

We computed the *F1* score, which offers a balanced measurement considering both recall and precision, to measure the detecting capability of different methods. The formula is defined as

$$F1 = \frac{2 \times Precision \times Recall}{Precision + Recall}$$

$$Recall = \frac{TP}{TP + FN} = \frac{N_c}{N_r}$$

$$Precision = \frac{TP}{TP + FP} = \frac{N_c}{N_d}$$

, where  $N_c$  is the number of WD40 repeats identified correctly,  $N_r$  is the total number of actual repeats in the non-redundant set of 65 WD40 proteins,  $N_d$  is the total number of predicted WD40 repeats.

The results showed that both the old WDSP and updated WDSP perform much better than other methods, either the loose or strict criteria. Moreover, the updated WDSP is even better than the old version especially in predicting the less conservative strand *d* and loop *cd*. Other methods showed their defects in detecting WD40 repeats. **(Figure S3).**



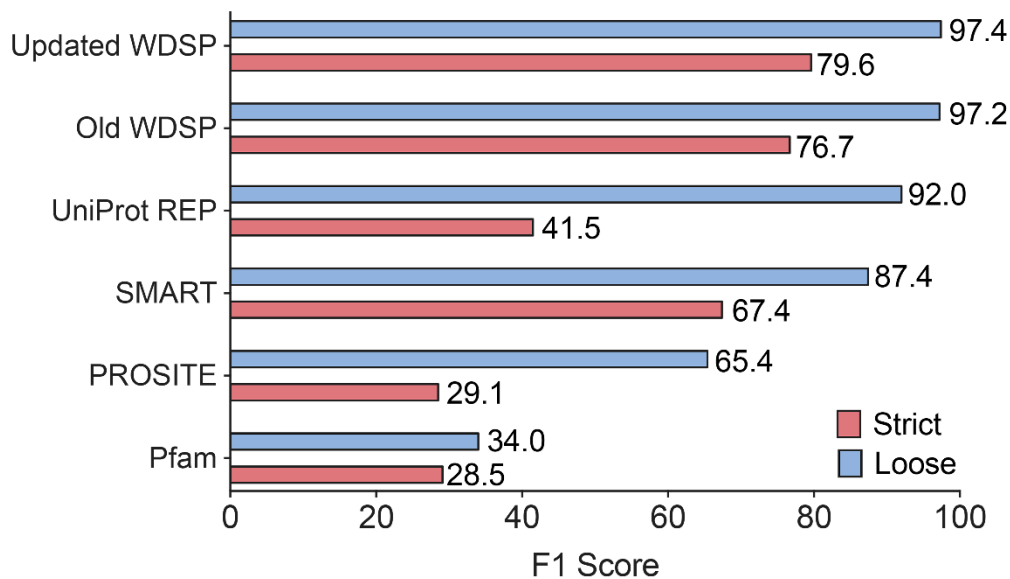

**Figure S3** The performance of identifying WD40 repeats by Pfam, PROSITE, SMART, UniProt REP, the old WDSP, and updated WDSP under the loose and strict criteria, as measured by F1 scores.

### 3. The optimized pipeline of WDSPdb 2.0

#### 3.1 Pre-screening the WD40 candidates

We used the “WD40” as keyword to search the InterPro database (Finn, *et al.*, 2017), and obtained 59 entries which contain 26 families, 24 domains, 5 homologous superfamilies, 3 repeats, and 1 conserved sites. By careful reading their descriptions, we chose those describing WD40 domain, WD40 repeat, or  $\beta$ -propeller. Since InterPro database is integrated from multiple other databases, each entry here may correspond to one or several contributing databases. We retrieved the HMM profiles from the contributing databases. If there is only multiple sequence alignment, but no profiles, we use HMMBuild from the HMMER package to construct the profile (Eddy, 2011). Some InterPro entries that didn’t provide either profile or sequence alignment were discarded.

Finally, we collected 54 WD40-related Hidden Markov model-based profiles

(HMM-profiles) from several well-known databases, such as Pfam, SMART, PIRSF, *etc* (**Table S2**). Adopting HMMSearch in the HMMER package, we searched the protein sequences in UniProtKB (release July 5, 2017) using each of these profiles (Eddy, 1998). If a protein got an E-value no more than 10 (default threshold of HMMSearch) by at least one profile, we considered it as a WD40 candidate. All candidates were subjected to run WDSP for more detailed annotation, and all the annotations were stored in WDSPdb 2.0.

**Table S2** 54 WD40-related HMM profiles

| Profile Name   | InterPro ID | Database of contributing signature | Contributing signature ID |
|----------------|-------------|------------------------------------|---------------------------|
| SM00320        | IPR001680   | SMART                              | SM00320                   |
| PS50082        | IPR001680   | PROSITE profiles                   | PS50082                   |
| PF00400        | IPR001680   | Pfam                               | PF00400                   |
| PF17005        | IPR031544   | Pfam                               | PF17005                   |
| PS00678        | IPR019775   | PROSITE profiles                   | PS00678                   |
| PF07676        | IPR011659   | Pfam                               | PF07676                   |
| PF12894        | IPR024977   | Pfam                               | PF12894                   |
| 53623          | IPR036322   | SUPERFAMILY                        | SSF50978                  |
| 48681          | IPR036322   | SUPERFAMILY                        | SSF50978                  |
| 47077          | IPR036322   | SUPERFAMILY                        | SSF50978                  |
| 48760          | IPR036322   | SUPERFAMILY                        | SSF50978                  |
| 48349          | IPR036322   | SUPERFAMILY                        | SSF50978                  |
| 48421          | IPR036322   | SUPERFAMILY                        | SSF50978                  |
| 47024          | IPR036322   | SUPERFAMILY                        | SSF50978                  |
| 54424          | IPR036322   | SUPERFAMILY                        | SSF50978                  |
| 48759          | IPR036322   | SUPERFAMILY                        | SSF50978                  |
| 47761          | IPR036322   | SUPERFAMILY                        | SSF50978                  |
| 49440          | IPR036322   | SUPERFAMILY                        | SSF50978                  |
| 48420          | IPR036322   | SUPERFAMILY                        | SSF50978                  |
| 46612          | IPR036322   | SUPERFAMILY                        | SSF50978                  |
| 49784          | IPR036322   | SUPERFAMILY                        | SSF50978                  |
| PF16756        | IPR031920   | Pfam                               | PF16756                   |
| PF14939        | IPR032734   | Pfam                               | PF14939                   |
| PF16529        | IPR032401   | Pfam                               | PF16529                   |
| SM01033        | IPR012952   | SMART                              | SM01033                   |
| PF08149        | IPR012952   | Pfam                               | PF08149                   |
| PTHR10856-SF23 | IPR027337   | PANTHER                            | PTHR10856:SF23            |
| PF08154        | IPR012972   | Pfam                               | PF08154                   |
| PTHR10856-SF2  | IPR027335   | PANTHER                            | PTHR10856:SF2             |
| PF15492        | IPR029145   | Pfam                               | PF15492                   |
| PTHR19846      | IPR027106   | PANTHER                            | PTHR19846                 |

|                |           |         |                |
|----------------|-----------|---------|----------------|
| MF_03022       | IPR026962 | HAMAP   | MF_03022       |
| PTHR11227-SF27 | IPR032911 | PANTHER | PTHR11227:SF27 |
| PTHR10856-SF10 | IPR027333 | PANTHER | PTHR10856:SF10 |
| PTHR10856-SF17 | IPR027339 | PANTHER | PTHR10856:SF17 |
| PTHR16038      | IPR037379 | PANTHER | PTHR16038      |
| PTHR10856-SF18 | IPR029508 | PANTHER | PTHR10856:SF18 |
| PTHR10856-SF20 | IPR027331 | PANTHER | PTHR10856:SF20 |
| PF08596        | IPR013905 | Pfam    | PF08596        |
| PR00320        | IPR020472 | PRINTS  | PR00320        |
| PF15889        | IPR031762 | Pfam    | PF15889        |
| PIRSF006425    | IPR014441 | PIRSF   | PIRSF006425    |
| PTHR11227-SF23 | IPR032909 | PANTHER | PTHR11227:SF23 |
| PTHR10856-SF24 | IPR027340 | PANTHER | PTHR10856:SF24 |
| PF11615        | IPR021653 | Pfam    | PF11615        |
| PTHR10253      | IPR037352 | PANTHER | PTHR10253      |
| SM01166        | IPR015048 | SMART   | SM01166        |
| PF08953        | IPR015048 | Pfam    | PF08953        |
| PTHR10856      | IPR015505 | PANTHER | PTHR10856      |
| PTHR11024      | IPR037363 | PANTHER | PTHR11024      |
| PF11635        | IPR021665 | Pfam    | PF11635        |
| PTHR10644-SF3  | IPR031297 | PANTHER | PTHR10644:SF3  |
| PF11540        | IPR025956 | Pfam    | PF11540        |
| PIRSF037237    | IPR017149 | PIRSF   | PIRSF037237    |

### 3.2 Data overview and comparison

After pre-screening by HMMSearch, we retained 594,402 entries from UniProtKB (release July 5, 2017). We then utilized the updated WDSP to predict the detailed secondary structures of all the sequences except 83 from TrEMBL section, which were too long to be handled. Finally, a total of 594,319 entries and their secondary structures were stored in the WDSPdb 2.0 (5,601 in Swiss-Prot section, 588,718 in TrEMBL section).

The number of WD40 proteins is significantly increased in the WDSPdb 2.0 compared to that in the WDSPdb 1.0. As for the Swiss-Prot section, all of entries in version 1.0 have been included in version 2.0. As for the TrEMBL section, most of the entries in version 1.0 have been recorded in version 2.0 except 4,361 (**Figure S4**). The “missing” 4,361 proteins are caused by the updates between different UniProtKB

versions: Through tracing these entries in different UniProtKB version, we found most of them had been removed in UniProtKB (release July 5, 2017), a few of them had been moved from TrEMBL section to Swiss-Prot, and a few of them had modified their protein sequences. All of the entries that were moved to Swiss-Prot section are included in WDSPdb 2.0 without any exception.

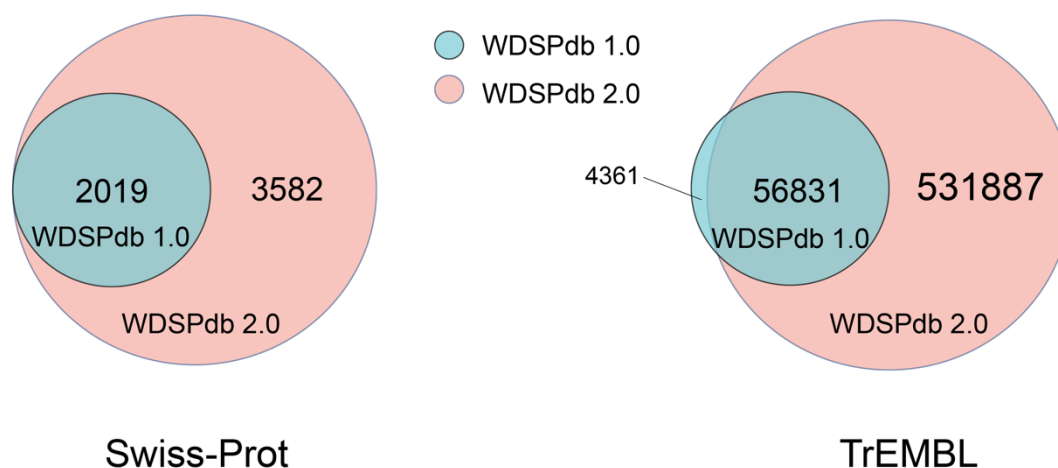

**Figure S4** The comparison of the entries between WDSPdb 1.0 and 2.0.

### 3.3 Confidence category assignment

The WDSPdb 2.0 greatly expanded database capacity. In order to cater for different scientific study demands, we assigned a confidence category to each WD40 candidate according to the criteria described in this section.

In the descriptions in section 2.1 and **Table S1**, we have manually curated a non-redundant “reference” set of 65 typical WD40 proteins with experimental structures. Here, we further collected a set of 98 non-typical WD40 structures. After removing redundancy in a similar way, we finally obtained 80 non-typical WD40 structures (**Table S3**).

**Table S3** The information of non-typical WD40 structures

| Number | UniProt ACC | Gene name | PDB ID | Redundant or not |
|--------|-------------|-----------|--------|------------------|
| 1      | G0S4F3      | NUP82     | 5CWW   |                  |

|    |        |            |      |           |
|----|--------|------------|------|-----------|
| 2  | G0S7B6 | NUP170     | 5HAX |           |
| 3  | O51396 | gyrA       | 1SUU |           |
| 4  | O67108 | gyrA       | 3NO0 | Redundant |
| 5  | O74965 | SPBC4B4.04 | 3WJ9 |           |
| 6  | O75326 | SEMA7A     | 3NVQ |           |
| 7  | O75694 | NUP155     | 5IJN |           |
| 8  | O95198 | KLHL2      | 4CHB |           |
| 9  | Q53G59 | KLHL12     | 2VPJ | Redundant |
| 10 | Q9UH77 | KLHL3      | 4CH9 | Redundant |
| 11 | O95714 | HERC2      | 3KCI |           |
| 12 | P06103 | PRT1       | 4U1F |           |
| 13 | P0A855 | tolB       | 2HQS |           |
| 14 | Q8ZGZ1 | tolB       | 4PWZ | Redundant |
| 15 | P0C581 | par-1      | 4CZX |           |
| 16 | P10493 | Nid1       | 1NPE |           |
| 17 | P11442 | Cltc       | 1BPO |           |
| 18 | P12293 | moxF       | 1LRW |           |
| 19 | P38539 | NULL       | 2AD6 | Redundant |
| 20 | P16027 | moxF       | 1W6S | Redundant |
| 21 | P13650 | gdhB       | 1CRU |           |
| 22 | P14740 | Dpp4       | 4FFV |           |
| 23 | P22411 | DPP4       | 1ORV | Redundant |
| 24 | P27487 | DPP4       | 4A5S | Redundant |
| 25 | Q12884 | FAP        | 1Z68 | Redundant |
| 26 | P14925 | Pam        | 3FVZ |           |
| 27 | P21062 | A39R       | 3NVX |           |
| 28 | Q8JL80 | EVM139     | 3NVN | Redundant |
| 29 | P21827 | SRM1       | 3OF7 |           |
| 30 | P22219 | VPS15      | 3GRE |           |
| 31 | P23006 | mauB       | 3C75 |           |
| 32 | P29894 | mauB       | 2BBK | Redundant |
| 33 | P25171 | Rcc1       | 3MVD |           |
| 34 | P26449 | BUB3       | 1YFQ |           |
| 35 | P27169 | PON1       | 1V04 |           |
| 36 | P27801 | PEP3       | 4UUY |           |
| 37 | P32523 | PRP19      | 4ZB4 |           |
| 38 | P35729 | NUP120     | 3F7F |           |
| 39 | P38677 | NCU04071   | 1JOF |           |
| 40 | P39371 | nanM       | 2UVK |           |
| 41 | P40064 | NUP157     | 4MHC |           |
| 42 | P40368 | NUP82      | 3PBP |           |
| 43 | P40477 | NUP159     | 1XIP |           |
| 44 | P42658 | DPP6       | 1XFD |           |

|    |        |         |      |           |
|----|--------|---------|------|-----------|
| 45 | Q8N608 | DPP10   | 4WJL | Redundant |
| 46 | P48147 | PREP    | 3DDU |           |
| 47 | P23687 | PREP    | 2XDW | Redundant |
| 48 | P49951 | CLTC    | 5M5T |           |
| 49 | P52697 | pgl     | 1RI6 |           |
| 50 | P53136 | NSA1    | 5SUI |           |
| 51 | P55884 | EIF3B   | 5K1H |           |
| 52 | P72181 | nirS    | 1QKS |           |
| 53 | P24474 | nirS    | 1NIR | Redundant |
| 54 | P75804 | yliI    | 2G8S |           |
| 55 | P76116 | yncE    | 3VGZ |           |
| 56 | P77774 | bamB    | 3Q7M |           |
| 57 | Q9HXJ7 | bamB    | 4HDJ | Redundant |
| 58 | P84888 | aauB    | 2OIZ |           |
| 59 | P84908 | daip    | 5FZP |           |
| 60 | P96086 | tri     | 1K32 |           |
| 61 | P9WI79 | pknD    | 1RWI |           |
| 62 | Q00610 | CLTC    | 4G55 |           |
| 63 | Q02793 | SKI8    | 1SQ9 |           |
| 64 | Q04693 | RSE1    | 5GM6 |           |
| 65 | Q06339 | TFC6    | 2J04 |           |
| 66 | Q08282 | PPM2    | 2ZWA |           |
| 67 | Q12038 | SRO7    | 2OAJ |           |
| 68 | Q12308 | TFC8    | 2J04 |           |
| 69 | Q15393 | SF3B3   | 5IFE |           |
| 70 | Q15493 | RGN     | 3G4E |           |
| 71 | Q3SYG4 | BBS9    | 4YD8 |           |
| 72 | Q4W6G0 | qgdA    | 1YIQ |           |
| 73 | Q46444 | qheDH   | 1KB0 | Redundant |
| 74 | Q8GR64 | qbdA    | 1KV9 | Redundant |
| 75 | Q51705 | nosZ    | 1FWX |           |
| 76 | Q6CN23 | HSV2    | 4V16 |           |
| 77 | Q70DK5 | xghA    | 2CN3 |           |
| 78 | Q72U69 | orfC    | 3BWS |           |
| 79 | Q7MUW6 | ptpA    | 2Z3Z |           |
| 80 | Q7SIG4 | NULL    | 1PJX |           |
| 81 | Q8CJF7 | Ahctf1  | 4I00 |           |
| 82 | Q8DI95 | tll1695 | 2XBG |           |
| 83 | Q8FA95 | yjiK    | 3QQZ |           |
| 84 | Q8J0D2 | NULL    | 1SQJ |           |
| 85 | Q8MQJ9 | brat    | 1Q7F |           |
| 86 | Q8N122 | RPTOR   | 5H64 |           |
| 87 | Q8UEU8 | Atu1656 | 2OJH |           |
| 88 | Q8WUM0 | NUP133  | 1XKS |           |

|    |        |            |      |           |
|----|--------|------------|------|-----------|
| 89 | Q99523 | SORT1      | 3F6K |           |
| 90 | Q9BVC4 | MLST8      | 4JSN |           |
| 91 | Q9ER30 | Klh41      | 2WOZ |           |
| 92 | Q9FN03 | UVR8       | 4NBM |           |
| 93 | Q9UJX5 | ANAPC4     | 5BPW |           |
| 94 | Q9Y4B6 | DCAF1      | 4PXW |           |
| 95 | Q9YBQ2 | APE_1547.1 | 3O4H |           |
| 96 | Q9Z2X8 | Keap1      | 3WN7 |           |
| 97 | Q14145 | KEAP1      | 1ZGK | Redundant |
| 98 | Q9Z4J7 | exaA       | 1FLG |           |

Next, we submitted them to the updated WDSP to obtain their WD40 repeats predictions and repeats scores. For each protein, we can obtain an average repeat score. It is shown that there is significantly difference in the average repeat scores between these two sets (p-value <0.0001, Mann Whitney test) (**Figure S5**). When selecting an average repeat score as cut-off, the repeat whose average score is greater than the cut-off would be considered as typical WD40 proteins. By analyzing the repeat score distributions, we manually defined two cut-offs, 44 and 62. The average repeat score 62 is the best discriminable cut-off, *i.e.*, the junction point of distribution curves of typical and non-typical WD40 proteins' average repeat score (**Figure S5**). The cut-off 44 was the lowest average repeat score in typical WD40 proteins. It was chosen as a second cut-off because the requirement of the average repeat scores greater than 44 can successfully identify all the typical WD40 proteins.

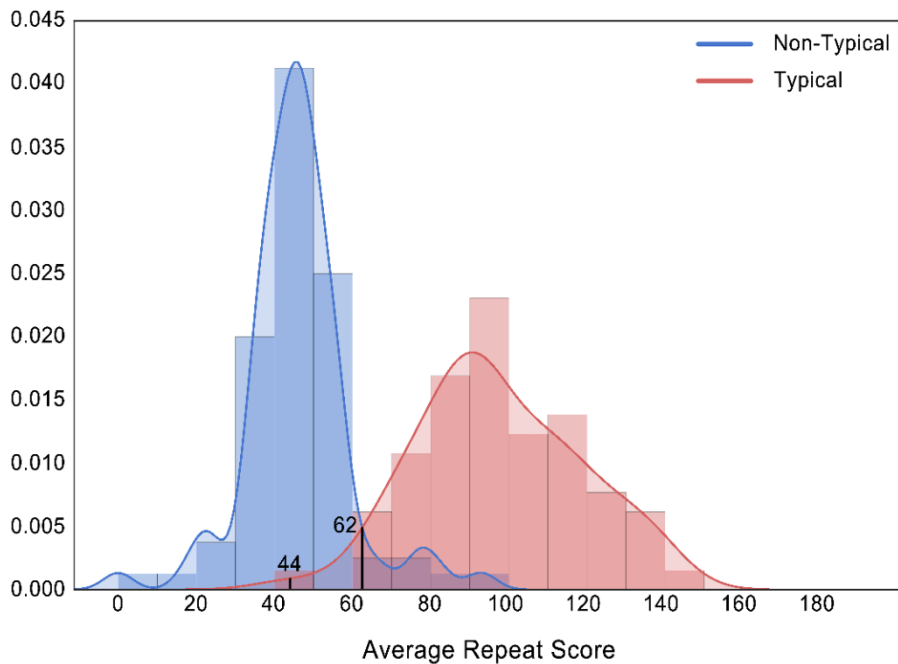

**Figure S5** The average WD40 repeat scores distributions of typical and non-typical WD40 proteins.

Besides average repeat score, the unique hydrogen bond network is also an important signature of WD40 proteins. Furthermore, 6 or more WD40 repeats would be more easily to form a closed  $\beta$ -propeller structure. Taking all these features into account, we proposed the rules (**Figure S6**) of assigning four categories for all WD40 candidates:

- 1) “High”:
  - a) with PDB structure AND manually reviewed (*i.e.*, in “reference” set); OR
  - b) the average repeat score  $\geq 62$  AND repeats count  $\geq 6$ ;
- 2) “Middle”:
  - a) the average repeat score  $\geq 44$  AND  $< 62$  AND contains at least one hydrogen bond network AND repeat count  $\geq 6$ ;
  - b) the average repeat score  $\geq 62$  AND repeat count  $< 6$ ;
- 3) “Low”:
  - a) the average repeat score  $< 44$ ; OR
  - b) the average repeat score  $\geq 44$  AND  $< 62$  AND (contains no hydrogen bond



network OR repeat count <6);

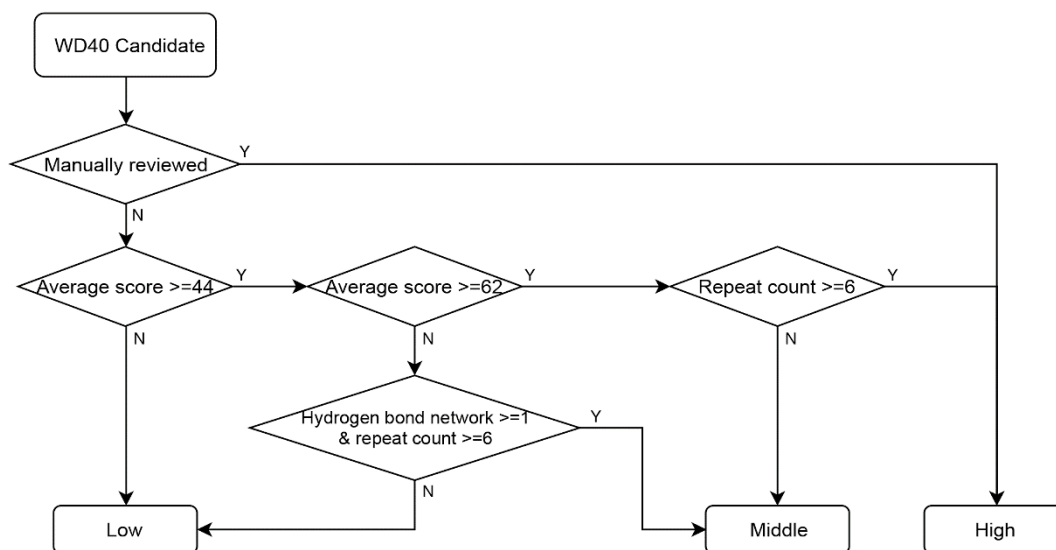

**Figure S6** The flow chart of assigning the confidence category to WD40 candidates.

### 3.4 3D structure modeling

WD40 proteins prefer forming a domain with 6, 7 or 8 repeats, but may encounter more complicated situations when the repeat number is more than 8 or less than 6. Hence, in order to ensure the quality and accuracy, we only modeled proteins in which repeat number is 6, 7, or 8 using MODELLER V9.20 software (Webb and Sali, 2016). Here, 97 typical WD40 structures served as a template pool in 3D homology modeling. Even if a protein has experimental structure of WD40 domain, we also run modeling by using itself as template to fix chain-breaking problems and so on. For those that don't have experimental structures, we selected a template from the template pool by a customized sequence alignment that just considers  $\beta$  strands sequence in WD40 domain. That is, we deleted all of loops between adjacent  $\beta$  strands, connected all of the remained  $\beta$  strands, pairwise aligned target sequences with the templates sequences and selected the PDB structures with highest similarity as template (**Figure S7A**). Since loops of WD40 proteins are flexible and less conservative, such operations could help select the best template while avoiding the interference brought by less conserved loops. After selecting the best template, we built a customized pairwise alignment

between the target and the template. That is, the  $\beta$ -strands were manually aligned since they were confined to the fixed lengths, and the corresponding loop regions were aligned by using global alignment algorithm (**Figure S7B**). The alignment and template PDB structure were submitted to MODELLER for 3D structure modeling.

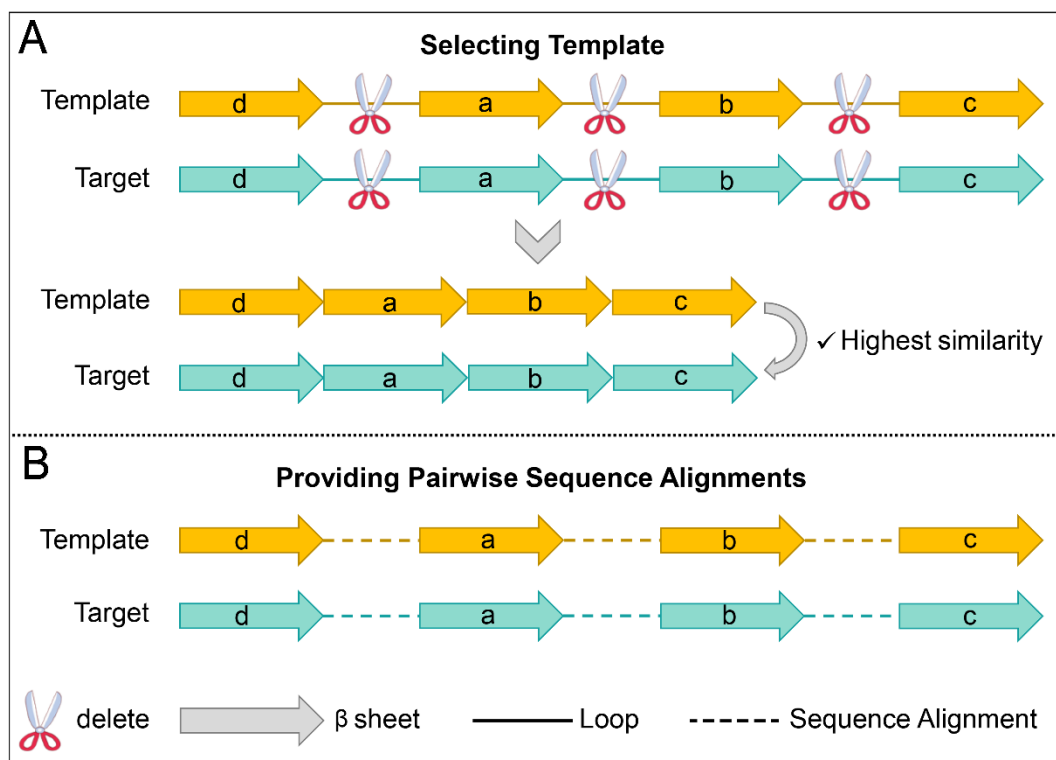

**Figure S7** The schematic diagram of selecting template and building pairwise sequence alignments for structure modeling.

### 3.5 WD40 variants mapping

The single amino acid variants are a good bridge to investigate the relationship between genotypes and phenotypes. In order to facilitate the analysis of WD40 proteins, we collected missense variants from several sources. These sources specialize in collecting different genomic alterations, such as germ-line disease-related alterations (ClinVar (Landrum, *et al.*, 2018), published clinical samples), cancer-related alterations (Cosmic (Forbes, *et al.*, 2017)), alterations detected by whole genome or exome sequencing (1000 Genomes (1000 Genomes Project Consortium, 2015), ExAC (Lek, *et al.*, 2016)).

Each source contains its own reference sequences to store substitutions. We

mapped these substitutions to UniProtKB proteins through sequence alignment. As for the 1000 Genomes and ExAC, we adopted VEP (McLaren, *et al.*, 2016) tool to translate codon changes to amino acid changes first, then mapped them by sequence alignment.

In a similar way, we also collected cancer driver mutations from IntOGen database (Release May, 2016)(Gonzalez-Perez, *et al.*, 2013), cancer highly recurrent mutations, which are originally annotated by the Cancer Hotspots (Chang, *et al.*, 2016), from cBioPortal (Cerami, *et al.*, 2012), and mutations have been experimentally shown to affect the PPIs from the IntAct (Kerrien, *et al.*, 2012).

All these types of variants were mapped to human WD40 proteins with the confidence category of “High” from the Swiss-Prot section through the method described above. For PPI-influencing variants in IntAct, WD40 proteins from other species were also considered. Finally, we have mapped 37,184 variants to 252 WD40 proteins, and integrated them into WDSFPdb 2.0. For these variants, we provide the annotations from the source databases, such as the specific cancer types associated with the cancer driver mutations obtained from IntOGen, the interacted partners which perturbed by the mutations from IntAct. We also present the special annotations including exact secondary structures locations, featured site identifications (hydrogen bond network, potential hotspots on the top face). In addition, we provide the pathogenic predictions from dbNSFP v3.5 (Liu, *et al.*, 2011; Liu, *et al.*, 2016). These comprehensive annotations would help users to conduct detailed and systematic pathogenic molecular mechanism studies.

## **4. Update of the website interface**

We redesigned the website by using the Django web framework (version: 2.0.6) and Bootstrap (version: 3.3.7), a front-end library, to provide cleaner web structure, more organized web pages, and more powerful web functions. The new website brings more convenience to users when browsing or searching the database.

Django is an open-source web framework built by the Python programming

language. It follows the MVC (Model-View-Controller) architectural pattern, which provides security and extensibility while keeping the site structure clean. Database interfaces are encapsulated into the model layer to ensure that users cannot directly operate the database, which prevents the web site from attacks, such as SQL injection. Django has also flexible routing capabilities that allow web developers to design their own URLs. Based on this feature, we designed a REST API to help users to send requests to WDSPdb 2.0 to download the secondary structure annotations predicted by WDSP.

Bootstrap is the world's most popular front-end component library, which provides an abundant and powerful toolkit for developing with HTML, CSS and JS. By importing its library, we not only designed bootstrap-style web pages, but also added more user-friendly and advanced functions to our site. For example, we used the grid system of bootstrap to make the page layout more concise and easier to read. In addition, WDSPdb 2.0 adopted the bootstrap-table, a JavaScript plug-in, which enables user-customized data display and download in multiple formats (.txt, .csv, .json, *etc*).

Moreover, we replaced the structure visualization tool to NGL viewer for faster loading and smoother operation. NGL viewer can fully take advantage of the capabilities of modern web browsers (Rose and Burley, 2018). For example, by using hardware-accelerated graphics through WebGL API, WDSPdb 2.0 can provide more visualization modes (cartoon, balls and sticks, surface, spacefill, *et. al.*) and coloring schemes (rainbow, by secondary structure, by chain, by b-factor, *etc.*) without reducing performance. We implemented a strategy to view the variants and the featured sites at the same time, which would help the users to understand the impact of the variants in the structural context intuitively. As for the WDSP tool, we added options for tuning two parameters, the homolog-searching data bank and the iterative times, in order to meet different user requirements.

## 5. References

- 1000 Genomes Project Consortium. (2015) A global reference for human genetic variation. *Nature*, **526**(7571):68-74.
- Bateman, A., *et al.* (2017) UniProt: the universal protein knowledgebase. *Nucleic Acids Research*, **45**(D1):D158-D169.
- Buchan, D.W., *et al.* (2013) Scalable web services for the PSIPRED Protein Analysis Workbench. *Nucleic Acids Res*, **41**(Web Server issue):W349-357.
- Cerami, E., *et al.* (2012) The cBio Cancer Genomics Portal: An Open Platform for Exploring Multidimensional Cancer Genomics Data (vol 2, pg 401, 2012). *Cancer Discov*, **2**(10):960-960.
- Chang, M.T., *et al.* (2016) Identifying recurrent mutations in cancer reveals widespread lineage diversity and mutational specificity. *Nat Biotechnol*, **34**(2):155-+.
- Eddy, S.R. (1998) Profile hidden Markov models. *Bioinformatics*, **14**(9):755-763.
- Eddy, S.R. (2011) Accelerated Profile HMM Searches. *Plos Comput Biol*, **7**(10).
- Finn, R.D., *et al.* (2017) InterPro in 2017-beyond protein family and domain annotations. *Nucleic Acids Res*, **45**(D1):D190-D199.
- Finn, R.D., *et al.* (2016) The Pfam protein families database: towards a more sustainable future. *Nucleic Acids Research*, **44**(D1):D279-D285.
- Forbes, S.A., *et al.* (2017) COSMIC: somatic cancer genetics at high-resolution. *Nucleic Acids Res*, **45**(D1):D777-D783.
- Gonzalez-Perez, A., *et al.* (2013) IntOGen-mutations identifies cancer drivers across tumor types. *Nat. Meth.*, **10**(11):1081-1082.
- Kerrien, S., *et al.* (2012) The IntAct molecular interaction database in 2012. *Nucleic Acids Research*, **40**(D1):D841-D846.
- Landrum, M.J., *et al.* (2018) ClinVar: improving access to variant interpretations and supporting evidence. *Nucleic Acids Res*, **46**(D1):D1062-D1067.
- Lek, M., *et al.* (2016) Analysis of protein-coding genetic variation in 60,706 humans.

*Nature*, **536**(7616):285-291.

- Letunic, I. and Bork, P. (2018) 20 years of the SMART protein domain annotation resource. *Nucleic Acids Research*, **46**(D1):D493-D496.
- Liu, X.M., Jian, X.Q. and Boerwinkle, E. (2011) dbNSFP: A Lightweight Database of Human Nonsynonymous SNPs and Their Functional Predictions. *Human Mutation*, **32**(8):894-899.
- Liu, X.M., *et al.* (2016) dbNSFP v3.0: A One-Stop Database of Functional Predictions and Annotations for Human Nonsynonymous and Splice-Site SNVs. *Human Mutation*, **37**(3):235-241.
- McLaren, W., *et al.* (2016) The Ensembl Variant Effect Predictor. *Genome Biol*, **17**(1):122.
- Rose, A.S. and Burley, S.K. (2018) Interactive Exploration of Non-Covalent Interactions with the NGL Viewer. *Biophys J*, **114**(3):343a-343a.
- Sigrist, C.J.A., *et al.* (2013) New and continuing developments at PROSITE. *Nucleic Acids Research*, **41**(D1):E344-E347.
- Stirnemann, C.U., *et al.* (2010) WD40 proteins propel cellular networks. *Trends Biochem. Sci.*, **35**(10):565-574.
- Wang, Y., *et al.* (2013) A method for WD40 repeat detection and secondary structure prediction. *PLoS One*, **8**(6):e65705.
- Webb, B. and Sali, A. (2016) Comparative Protein Structure Modeling Using MODELLER. *Curr Protoc Protein Sci*, **86**:291-2937.
- Wu, X.H., *et al.* (2010) The effect of Asp-His-Ser/Thr-Trp tetrad on the thermostability of WD40-repeat proteins. *Biochemistry*, **49**(47):10237-10245.
- Wu, X.H., *et al.* (2012) Identifying the hotspots on the top faces of WD40-repeat proteins from their primary sequences by beta-bulges and DHSW tetrads. *PLoS One*, **7**(8):e43005.
- Xu, C. and Min, J. (2011) Structure and function of WD40 domain proteins. *Protein & cell*, **2**(3):202-214.
